# Supplementary material for: Linking lignin source with structural and electrochemical properties of lignin-derived carbon materials
Source: Royal Society of Chemistry journal article supplement (doi:10.1039/c8ra08539k), 2018-01-01
Supplement: c8ra08539k1.pdf [file c8ra08539k1.pdf]

*Electronic Supplemental Information*

**Linking Lignin Source with Structural and Electrochemical Properties of Lignin-Derived  
Carbons Materials**

Wenqi Li<sup>1</sup>, Yan Zhang<sup>2</sup>, Lalitendu Das<sup>1</sup>, Yikai Wang<sup>3</sup>, Mi Li<sup>4,5</sup>, Namal Wanninayake<sup>2</sup>, Yunqiao  
Pu<sup>4</sup>, Doo Young Kim<sup>2</sup>, Yang-Tse Cheng<sup>3</sup>, Arthur J Ragauskas<sup>4,5,6</sup>, Jian Shi<sup>1,\*</sup>

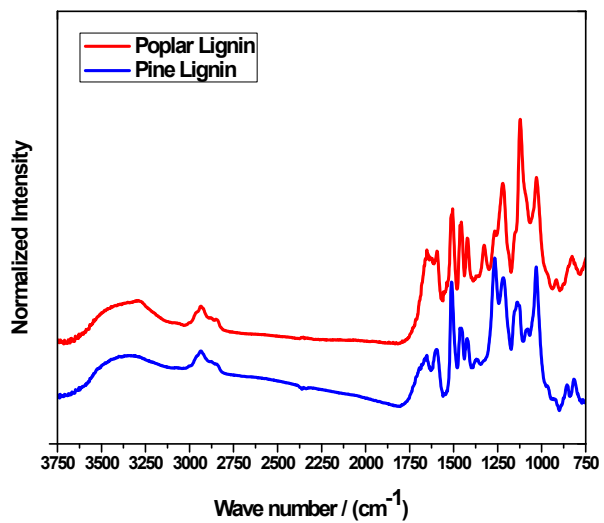

**Figure S1.** FTIR spectra of pine and poplar derived lignin.

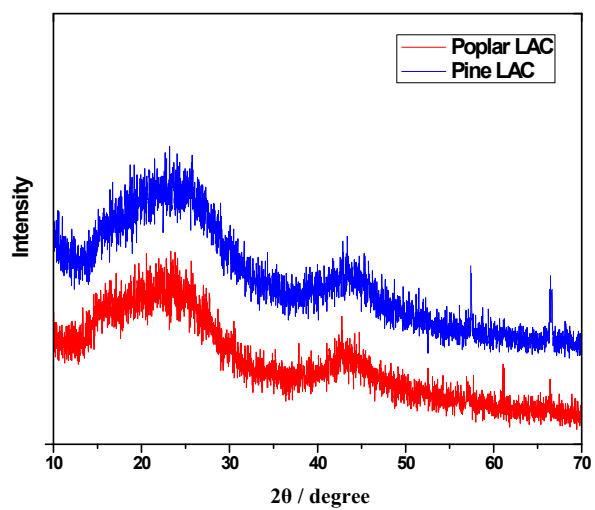

**Figure S2.** XRD spectra of pine and poplar lignin derived activated carbons.

**Table S1.** Mass balance for lignin carbonization & activation

| <b>Lignin Feedstock</b> | <b>Biochar yield (g/100g lignin)</b> | <b>AC yield (g/100g lignin)</b> |
|-------------------------|--------------------------------------|---------------------------------|
| Pine                    | 41.3 ± 3.9                           | 22.2 ± 1.4                      |
| Poplar                  | 29.4 ± 0.3                           | 23.2 ± 0.95                     |
